# Supplementary material for: Traceability of Geographical Origin in Gentiana straminea by UPLC-Q Exactive Mass and Multivariate Analyses
Source: MDPI journal article supplement (doi:10.3390/molecules24244478), 2019-12-06
Supplement: s1 [file s1]

# Supplementary

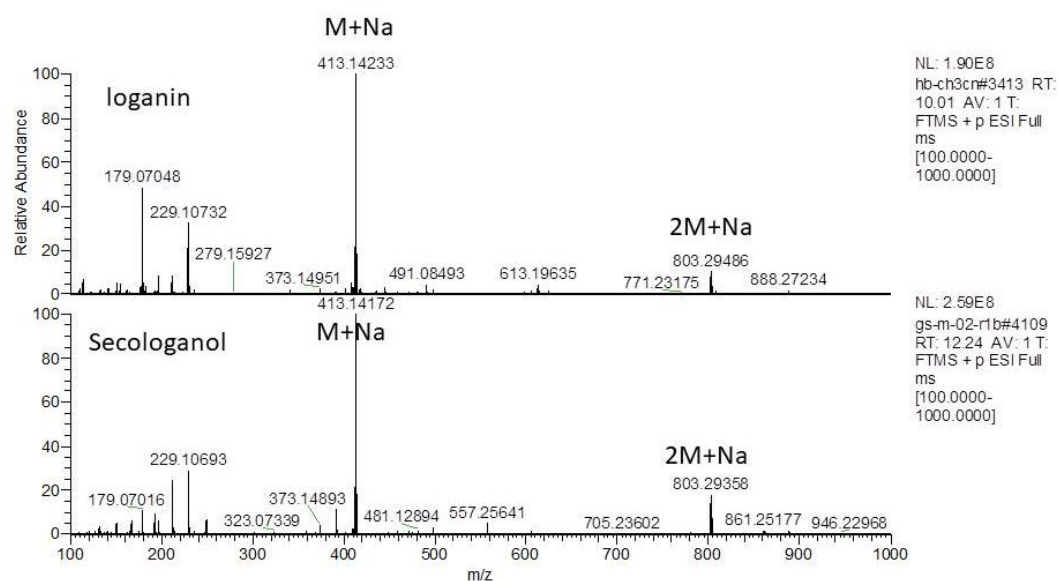

Fig.S1. the mass spectra of loganin and secologanol in positive ion mode by UPLC- Q Exactive mass spectrometer ([2M+Na]<sup>+</sup>).

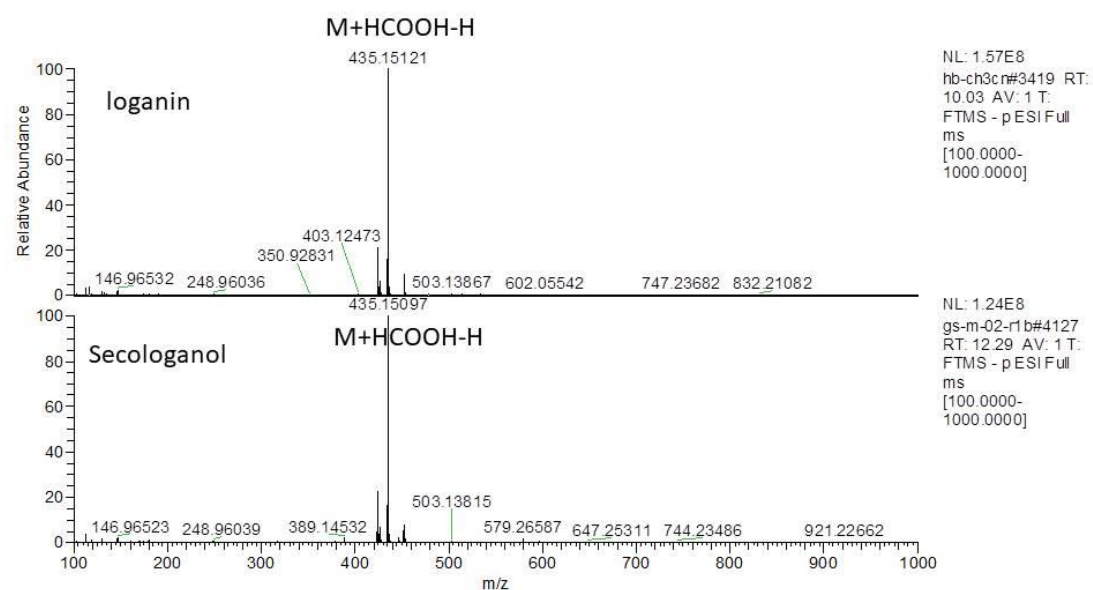

Fig.S2. the mass spectra of loganin and secologanol in negative ion mode by UPLC- Q Exactive mass spectrometer ([2M+HCOOH-H]<sup>-</sup>).

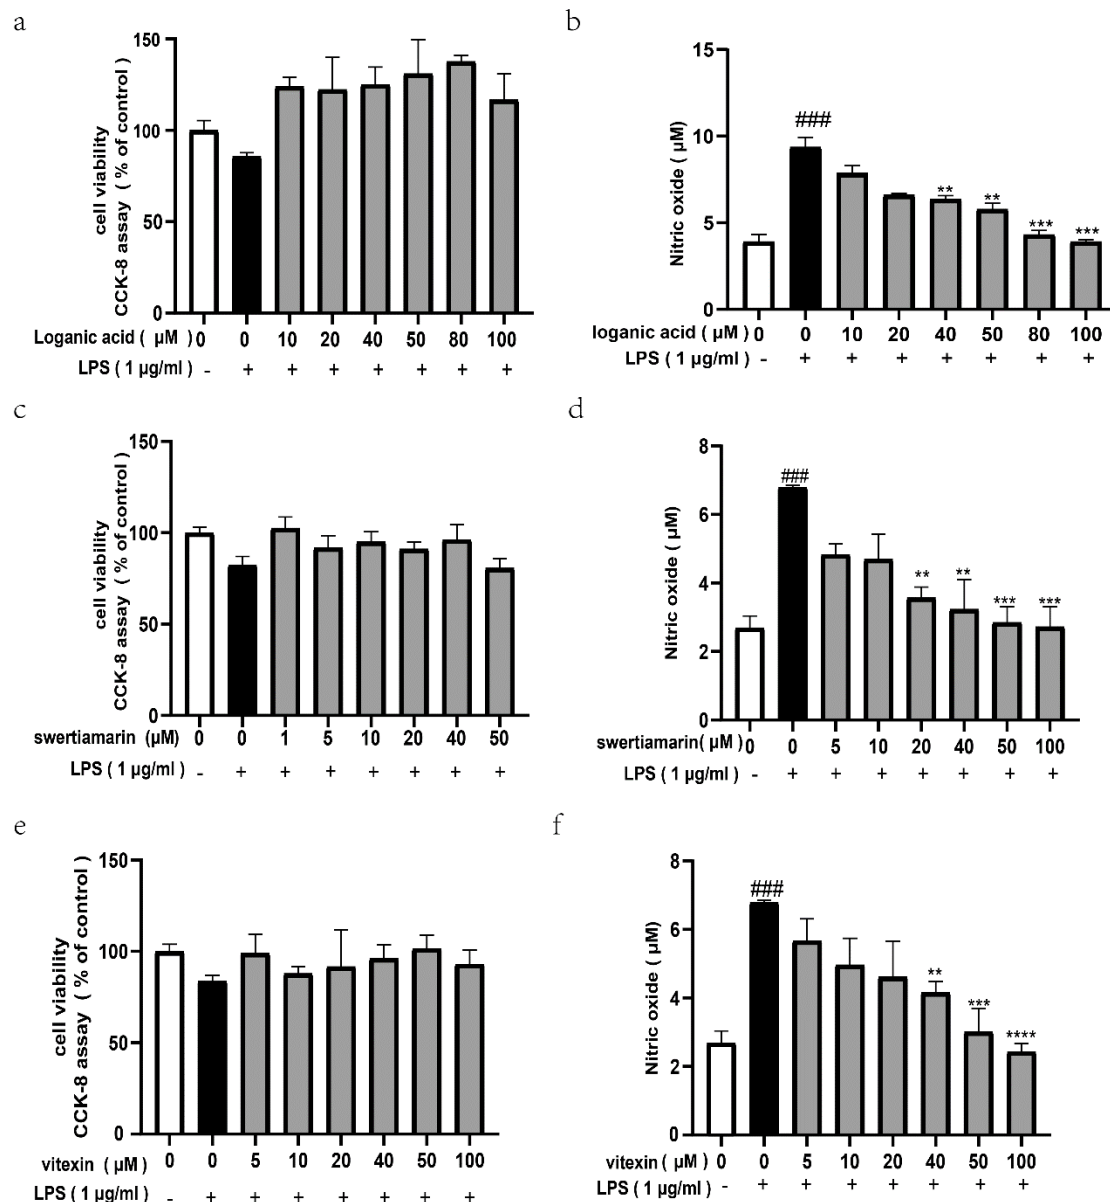

Fig.S3. Effects of loganic acid, swertiamarin, and vitexin on LPS-induced NO production in RAW 264.7 cells.

**a, c and e:** RAW 264.7 cells were exposed to different concentrations of loganic acid, swertiamarin and vitexin (0, 1, 5, 10, 20, 40, 50μM) with or without LPS (1 μg/ml) for 24 h. Cell viability was determined by using CCK-8 method.

**b:** RAW 264.7 cells were incubated with loganic acid (0, 5, 10, 20, 40, 80, 100μM) with stimulated by LPS (1 μg/ml) for 24 h. Extracellular levels of NO in culture media were measured using commercial Griess reagent. Data were folds of control and expressed as the mean ± SEM of six independent experiments.

**d and f:** RAW 264.7 cells were incubated with swertiamarin and vitexin (0, 5, 10, 20, 40, 50μM) with stimulated by LPS (1 μg/ml) for 24 h. Extracellular levels of NO in culture media were measured using commercial Griess reagent. Data were folds of control and expressed as the mean ± SEM of six independent experiments. \*\* $P < 0.01$ , \*\*\* $P < 0.001$ , \*\*\*\* $P < 0.0001$ , compared with the LPS alone.
